# Supplementary material for: Estimation of breeding values for uniformity of growth in Atlantic salmon (Salmo salar) using pedigree relationships or single-step genomic evaluation
Source: Genet Sel Evol. 2017 Mar 7;49:33. doi: 10.1186/s12711-017-0308-3 (PMC5439168; doi:10.1186/s12711-017-0308-3)
Supplement: Supplementary file 1 — Additional file 1: Figure S1. Estimated breeding values for standardized body weight and its uniformity based on sire-dam DHGLM. The data provided represent the boxplot of estimated (genomic) breeding values of genotyped animals based on sire-dam DHGLM when using pedigree (A) or combined pedigree and genomic relationships (H). [file 12711_2017_308_MOESM1_ESM.pdf]

## Additional file 1

### Estimated breeding values for standardized body weight (stdWT) and its uniformity from genotype animals based on sire-dam DHGLM

The use of **H** with sire-dam DHGLM resulted in higher variation of within-family GEBVs for stdWT and its uniformity, compared to within family EBVs (Figure. S1). However, the animal DHGLM resulted in considerably higher variation of within-family EBVs and GEBVs for stdWT and its uniformity, compared to sire-dam DHGLM (see Figure. 2).

**Figure S1** Boxplot of estimated breeding values of standardized body weight (stdWT) and its uniformity from genotyped animals by family. The breeding values were estimated

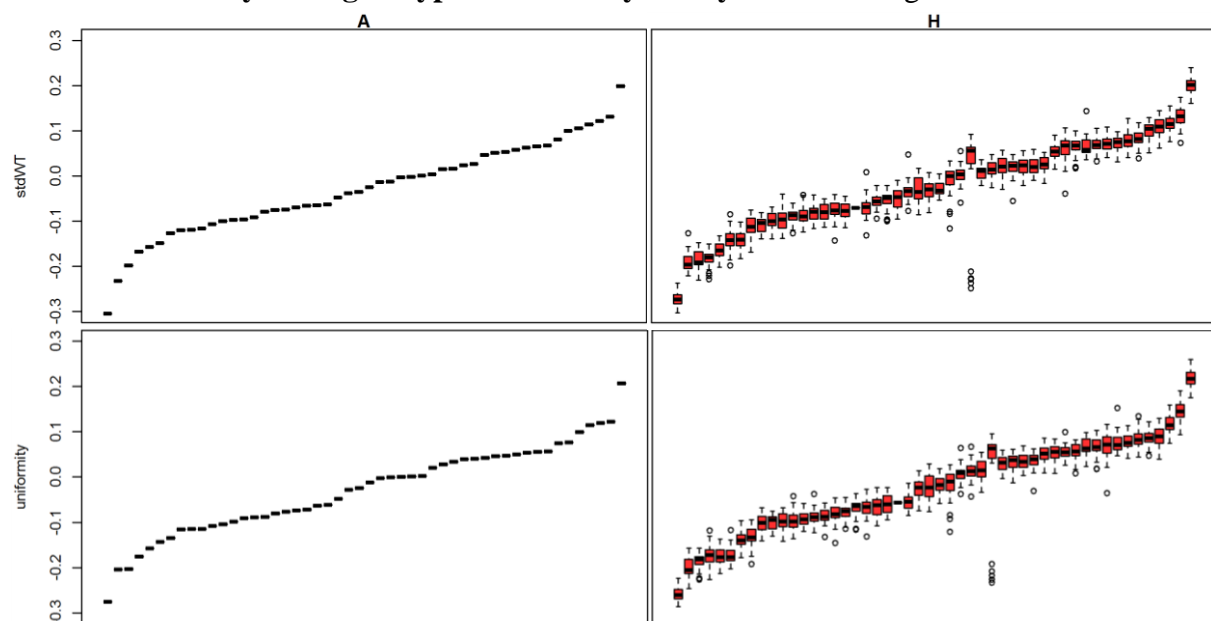

using sire-dam double hierarchical generalized linear model. The green boxplots are estimated breeding values (EBVs) using **A** matrix while the red boxplots are genomic estimated breeding values (GEBVs) using **H** matrix. The x-axis is the family identification.
